# Supplementary material for: Biomimetic synthesis of titania nanoparticles induced by protamine
Source: Royal Society of Chemistry journal article supplement (doi:10.1039/b802745e), 2008-01-01
Supplement: b802745e.pdf [file b802745e.pdf]

## Electronic Supplementary Information for

# Biomimetic synthesis of spherical titania nanoparticles controlled by protamine

YanJun Jiang, Dong Yang, Lei Zhang, Lin Li, Qianyun Sun, Yufei Zhang, Jian Li and Zhongyi Jiang\*

Key Laboratory for Green Chemical Technology of Ministry of Education, School of Chemical Engineering and Technology, Tianjin University, Tianjin 300072, P. R. China

Email: [zhyjiang@tju.edu.cn](mailto:zhyjiang@tju.edu.cn)

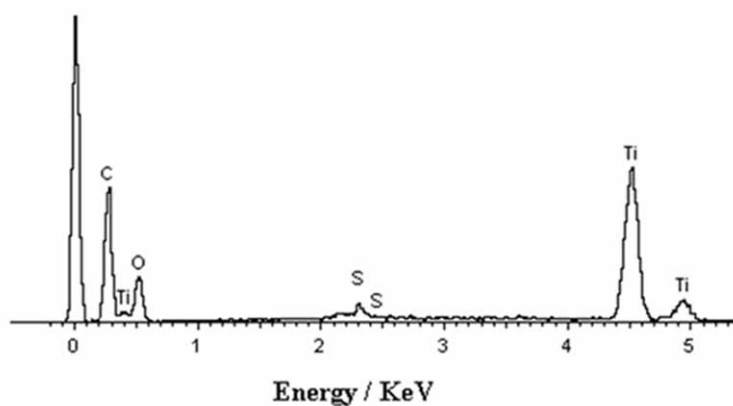

Fig. S1. EDS spectrum of protamine-induced titania materials.

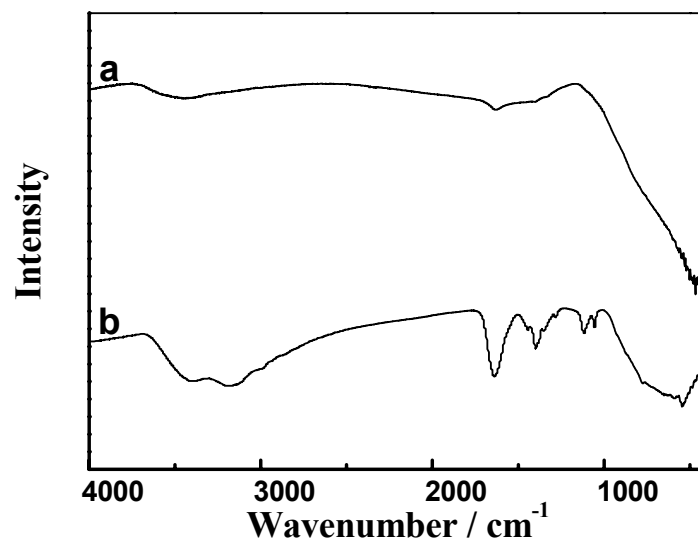

**Fig.S2.** FTIR spectra of (a) alkali-catalyzed and (b) protamine-induced titania particles.

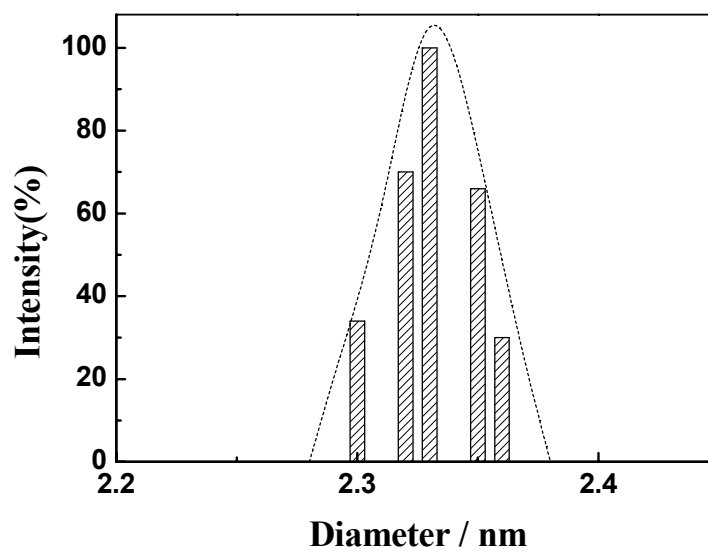

**Fig.S3.** The average diameter distribution of protamine dissolved in 0.05M, pH 7.0 Tris-HCl buffer solution.

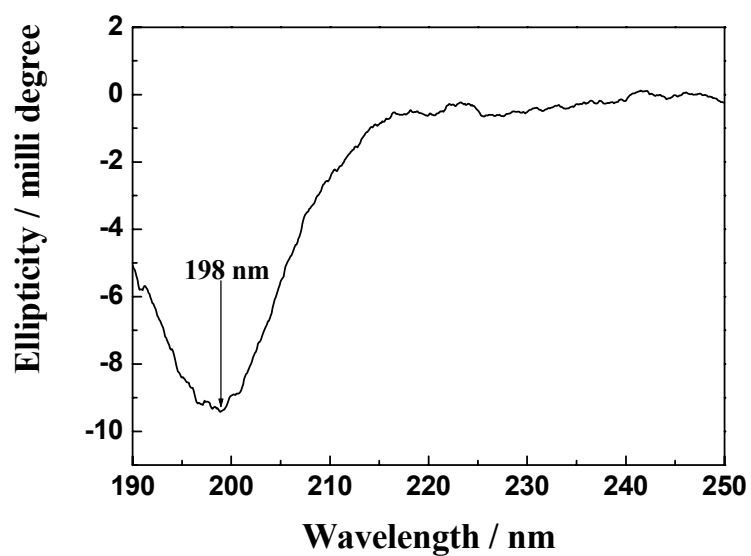

**Fig.S4.** Circular dichroism spectrum of protamine in 0.05 M, pH 7.0 Tris-HCl buffer solution.
